# Supplementary material for: Influence of the Level of Education on the Change in Cognitive Function in Parkinson´s Disease. A 5-year Follow-up Study.
Source: Research Square preprint supplement (doi:10.21203/rs.3.rs-4322344/v1), 2024-06-05
Supplement: Supplementary file 1 [file 83869a8be9f91b0dd23d28b8.docx]

**Table 3.** Changes in cognitive function from V0 (baseline) to V5 (5 years ± 3 months) in patients with PS vs SS vs US (N=227).

|  | **PS**  **V0 (N=88)** | **SS**  **V0 (N=77)** | **US**  **V0 (N=62)** | **PS**  **V5 (N=88)** | **SS**  **V5 (N=77)** | **US**  **V5 (N=62)** | pa | pb | pc | pd | pe | pf |
| --- | --- | --- | --- | --- | --- | --- | --- | --- | --- | --- | --- | --- |
| PD-CRS total score  PD-CSR FS sub-score  Immediate verbal memory  Sustained attention  Working memory  Clock drawing  Delayed verbal memory  Alternating verbal fluency  Action verbal fluency  PD-CRS PC sub-score  Confrontation naming  Clock copy | 85 ± 13.5  57.3 ± 12.3  7.2 ± 1.8  8.1 ± 1.8  6.7 ± 2.4  8.9 ± 1.8  4.2 ± 2.4  9.5 ± 3.9  12.9 ± 4.6  27.6 ± 3.2  18.1 ± 2.9  9.4 ± 0.9 | 95.6 ± 12.9  67.9 ± 10.9  8.5 ± 1.8  9 ± 1.4  7.5 ± 2.1  9.5 ± 2  5.8 ± 2.5  12.1 ± 3.7  15.6 ± 4.6  27.4 ± 4.2  17.5 ± 4  10 ± 1.2 | 101.4 ± 12.9  73.3 ± 12.4  8.7 ± 1.9  9.3 ± 1  8.1 ± 1.5  9.4 ± 1  6.4 ± 3.1  13.6 ± 4.5  17.9 ± 6.4  27.9 ± 3.5  18.2 ± 3.4  9.8 ± 0.5 | 79.1 ± 21.3  51.7 ± 18.1  7 ± 2.5  6.5 ± 2.7  5.4 ± 2.7  8.2 ± 2.4  4.5 ± 3.1  8.6 ± 4.5  11.4 ± 5.1  26.8 ± 4.4  18.1 ± 3  8.7 ± 2.3 | 92.9 ± 16.9  65.1 ± 13.8  8.5 ± 2.1  8.4 ± 1.8  6.8 ± 1.9  8.9 ± 1.7  6.2 ± 2.4  12.1 ± 4.4  14.1 ± 5.1  27.2 ± 4.5  17.9 ± 3.9  9.3 ± 1.5 | 97.9 ± 21.1  69.7 ± 18.2  8.8 ± 2  8.4 ± 2.1  7.1 ± 2.2  8.6 ± 2.1  6.9 ± 3.1  12.6 ± 4.6  17.2 ± 7.6  27.4 ± 4.3  18.2 ± 3.5  9.3 ± 1.8 | 0.002  <0.0001  0.485  <0.0001  <0.0001  0.035  0.335  0.053  0.002  0.097  1.000  0.002 | 0.075  0.024  0.917  0.001  0.008  0.018  0.095  0.978  0.005  0.682  0.304  0.001 | 0.100  0.057  0.809  0.001  <0.0001  0.002  0.151  0.066  0.392  0.277  0.964  0.018 | <0.0001  <0.0001  0.806  <0.0001  <0.0001  <0.0001  0.021  0.026  <0.0001  0.064  0.515  <0.0001 | 0.813  0.912  0.988  0.073  0.442  0.808  0.856  0.376  0.652  0.952  0.828  0.896 | <0.0001  <0.0001  <0.0001  <0.0001  <0.0001  0.123  <0.0001  <0.0001  <0.0001  0.778  0.317  0.047 |

P values were computed using general linear models (GLM) repeated measures. The results represent mean ± SD; pa, change over time (V5 vs V0) in patients with PS (N=88); pb, change over time (V5 vs V0) in patients with SS (N=77); pc, change over time (V5 vs V0) in patiets with US (N=62); pd, change over time (V5 vs V0) in the entire cohort (N=227). Age, gender, disease duration, and LEDD (levodopa equivalent daily dose) and mood (BDI-II) at V0 and at V5 were included as covariates (for pd, LoE was also included as covariate); pe, group visit interaction; pf, change over time (V5 vs V0) in patients with PS vs SS vs US; PS vs SS vs US is not is not applicable if test of interaction was significant (a significant test of interaction means the rates of changes over time are different between the two groups). All patients with the data at V0 and V5 were included for each comparative analysis.

FS, fronto-subcortical; PC, posterior-cortical; PD, Parkinson´s disease; PD-CRS, Parkinson’s Disease Cognitive Rating Scale.
